# Supplementary material for: A human serum albumin-binding-based fluorescent probe for monitoring hydrogen sulfide and bioimaging
Source: Royal Society of Chemistry journal article supplement (doi:10.1039/d3an01821k), 2024-01-01
Supplement: d3an01821k1.pdf [file d3an01821k1.pdf]

## Supporting Information

### A human serum albumin-binding-based fluorescent probe for monitoring hydrogen sulfide and bioimaging

#### Table of Contents

|                                                                                        |    |
|----------------------------------------------------------------------------------------|----|
| NMR data .....                                                                         | 2  |
| HRMS data .....                                                                        | 4  |
| The fluorescence spectra with various concentrations of H <sub>2</sub> S.....          | 5  |
| The fluorescence spectra with various concentrations of HSA.....                       | 6  |
| The fluorescence intensity in different pH conditions.....                             | 6  |
| The fluorescence intensity under various time conditions.....                          | 7  |
| The fluorescence intensity with various analytes.....                                  | 8  |
| The fluorescence intensity of different analytes coexisting with H <sub>2</sub> S..... | 8  |
| Molecular docking simulation of <b>TPABF</b> and <b>TPABF-HS</b> into HSA .....        | 9  |
| Cell viability with different concentrations of <b>TPABF-HS</b> .....                  | 10 |
| Comparison with the recent reported fluorescent probes for H <sub>2</sub> S.....       | 10 |

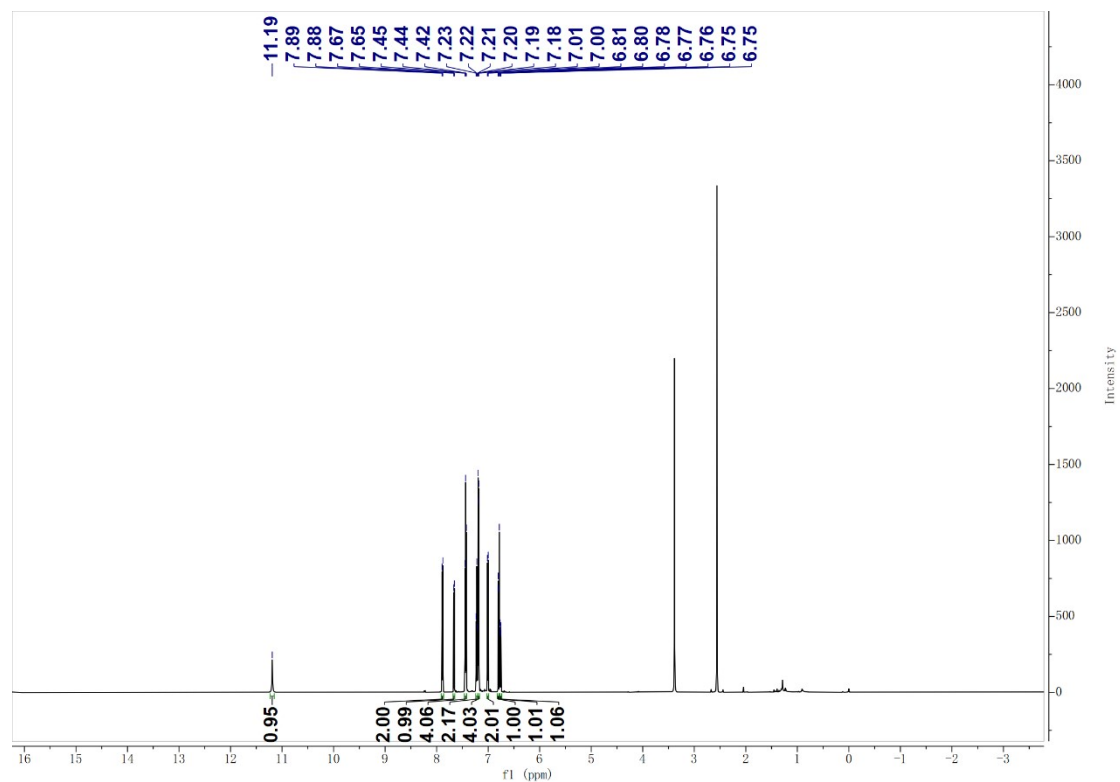

Figure S1.  $^1\text{H}$  NMR spectrum of the compound TPABF (600 MHz, in  $\text{DMSO-}d_6$ ).

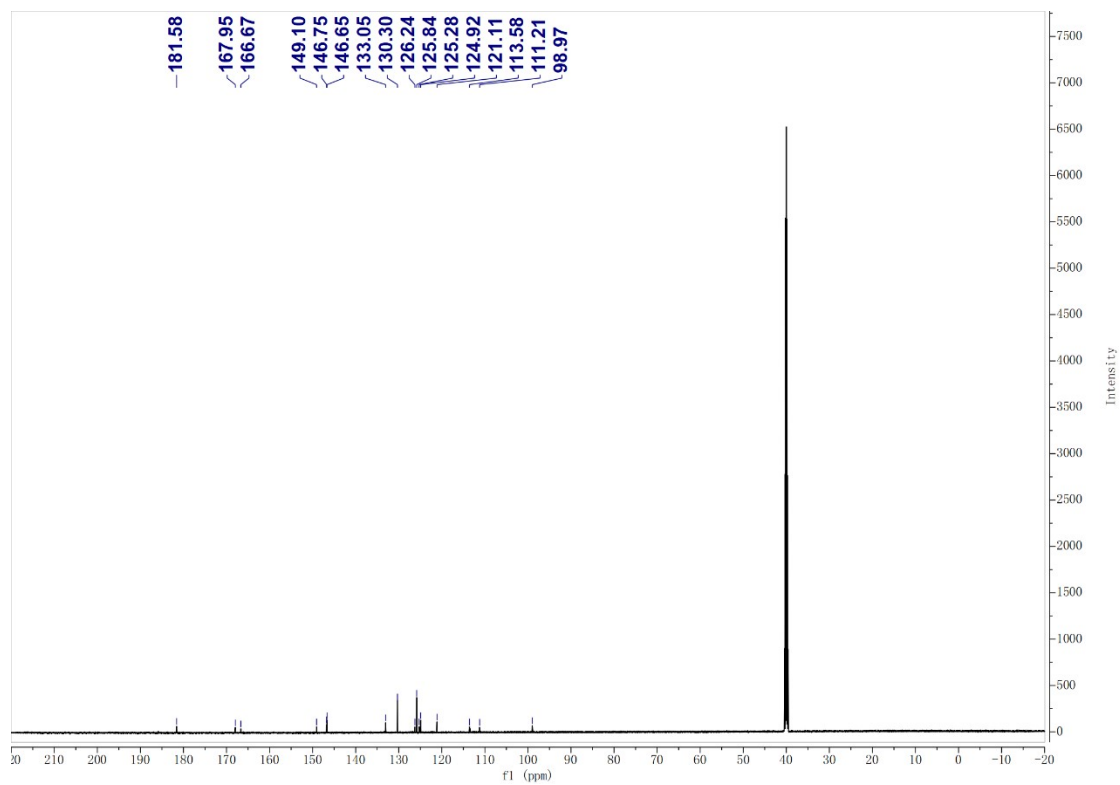

Figure S2.  $^{13}\text{C}$  NMR spectrum of the compound TPABF (151 MHz, in  $\text{DMSO-}d_6$ ).

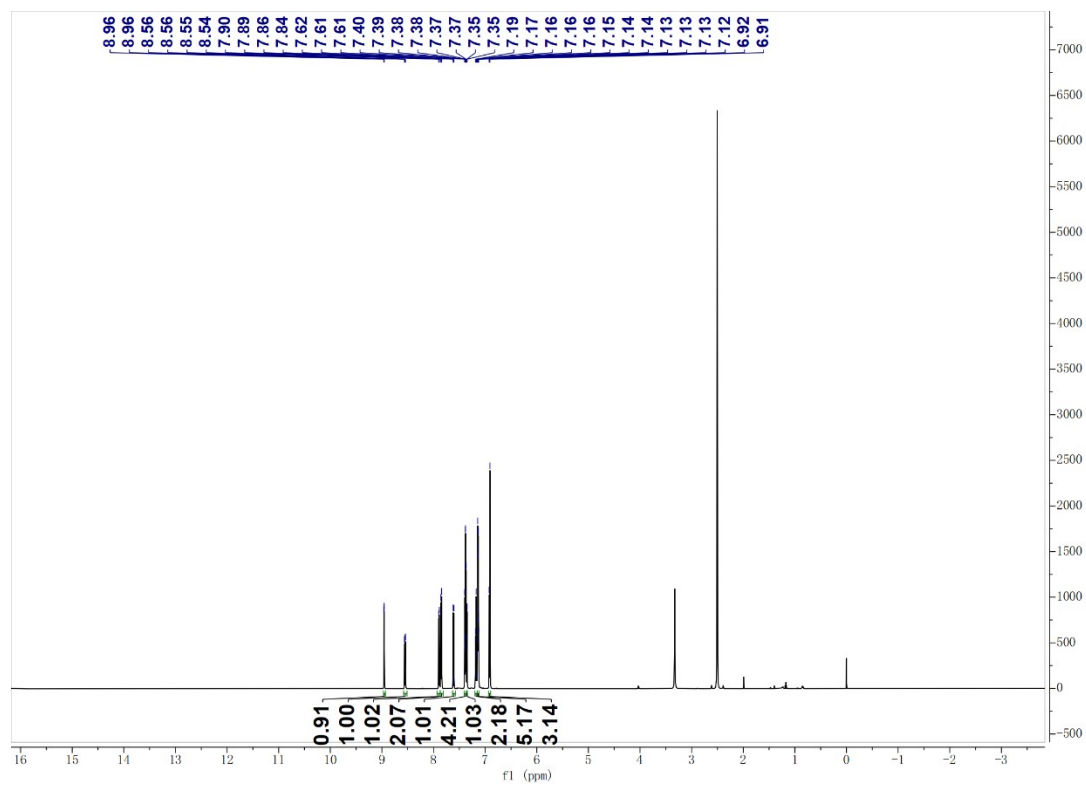

Figure S3.  $^1\text{H}$  NMR spectrum of the probe TPABF-HS (600 MHz, in  $\text{DMSO}-d_6$ ).

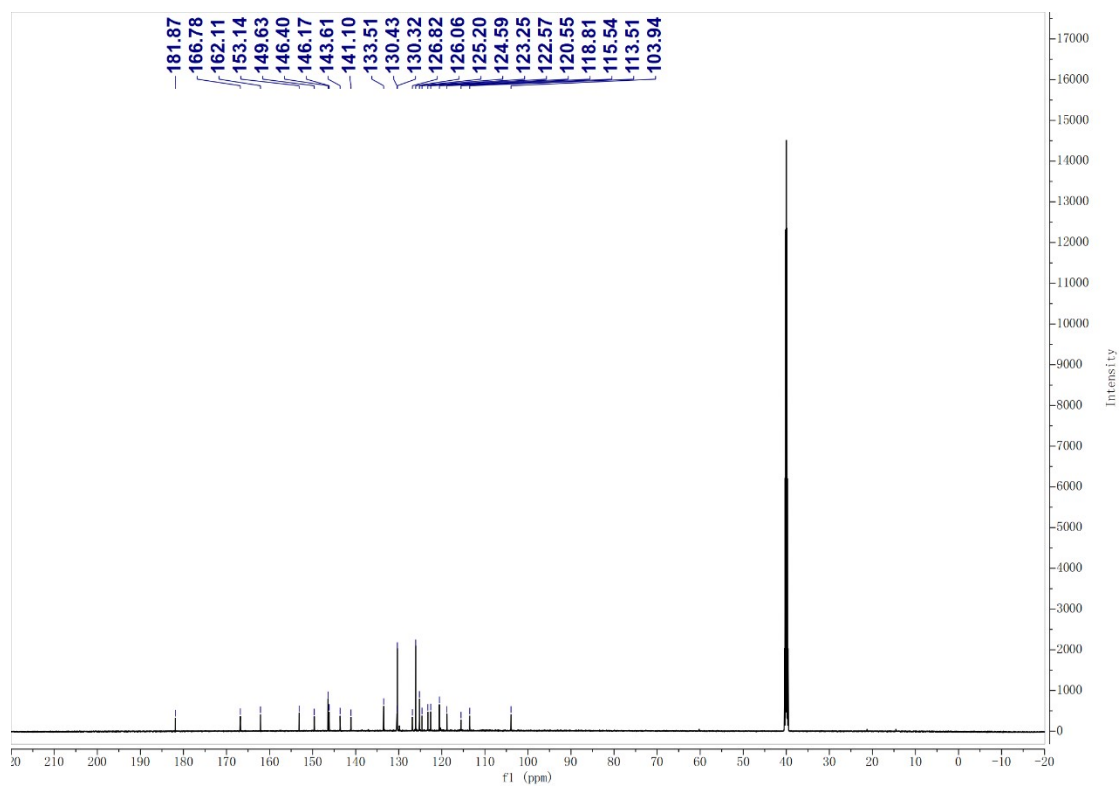

Figure S4.  $^{13}\text{C}$  NMR spectrum of the probe TPABF-HS (151 MHz, in  $\text{DMSO}-d_6$ ).

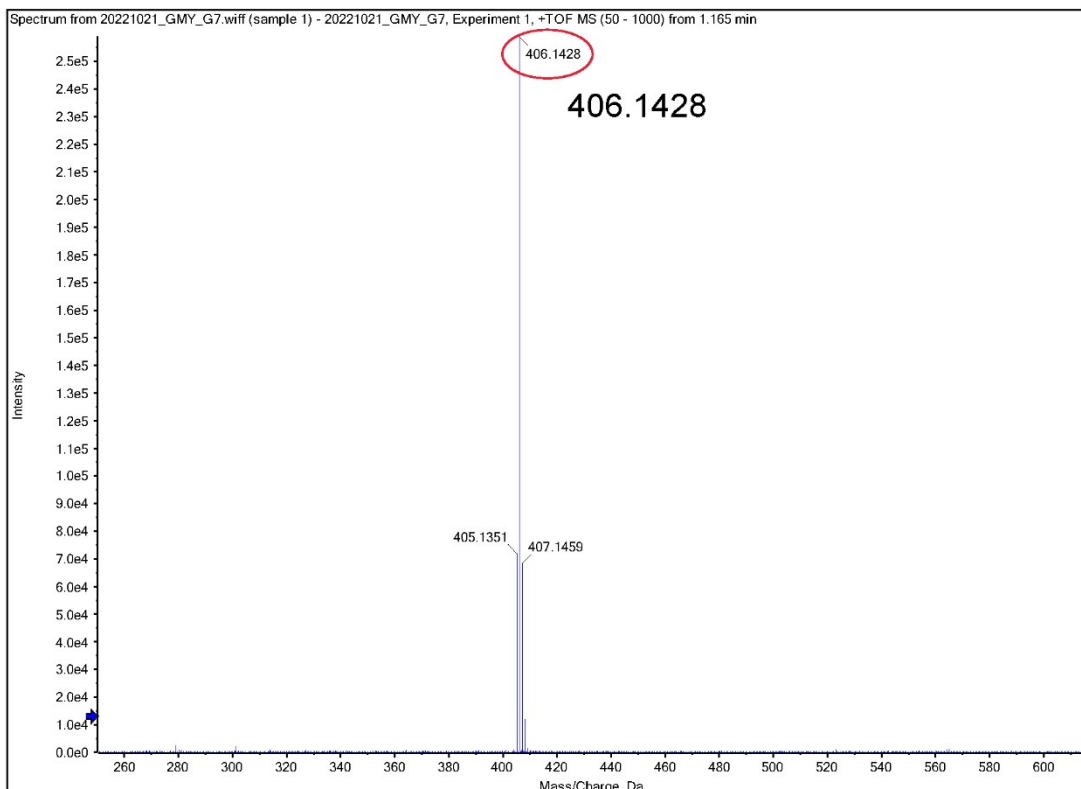

Figure S5. HRMS spectrum of the probe TPABF in acetonitrile.

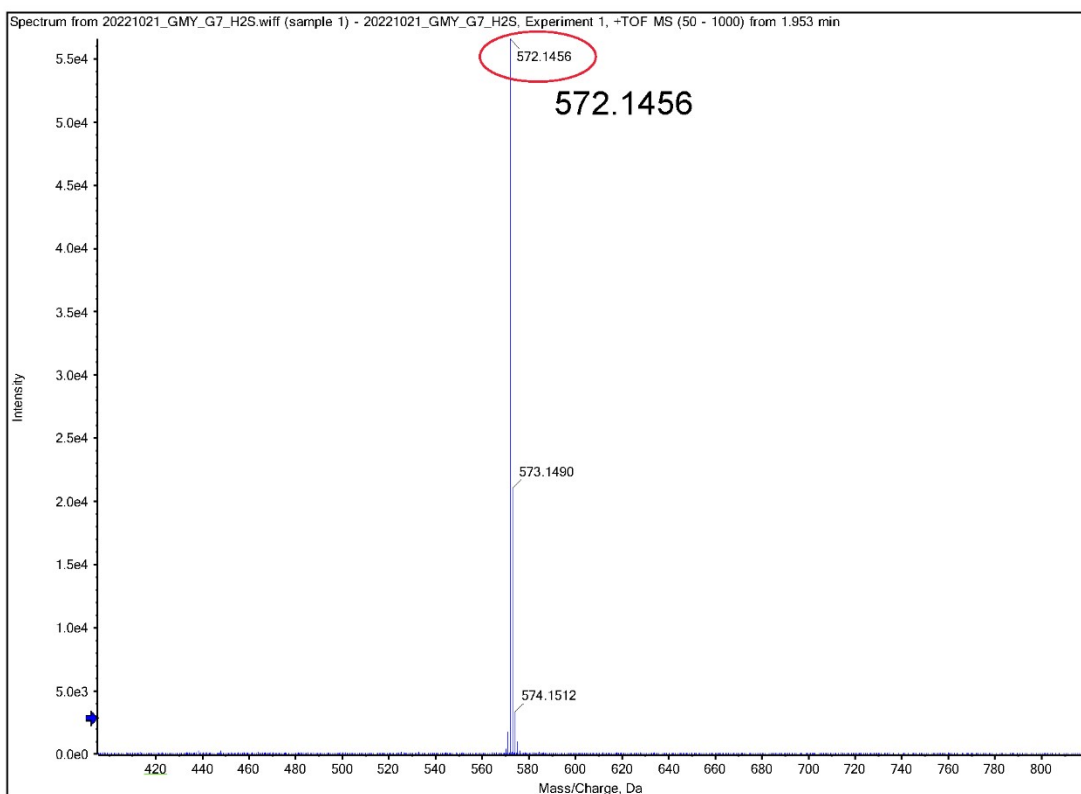

Figure S6. HRMS spectrum of the detecting product TPABF-HS in acetonitrile.

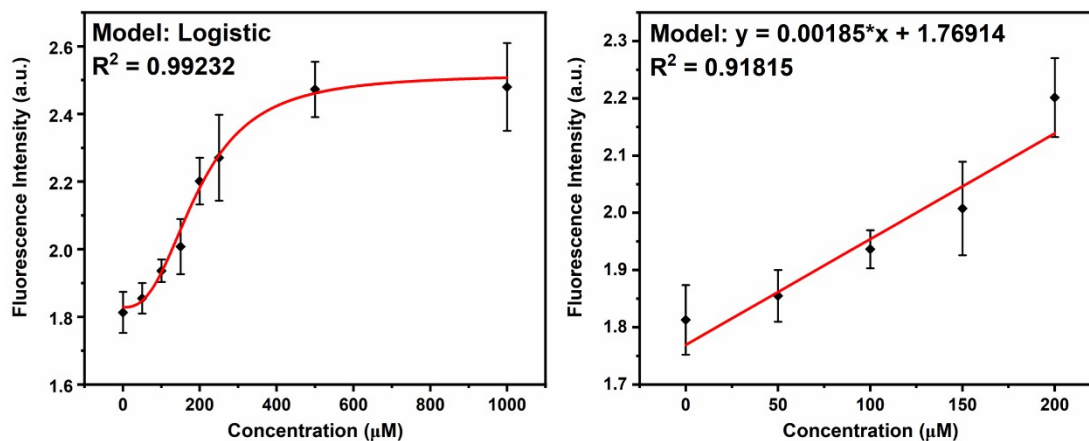

**Figure S7.** The fluorescence spectra of the detecting system containing TPABF-HS (10  $\mu\text{M}$ ) and  $\text{H}_2\text{S}$  of various concentrations (0-1000  $\mu\text{M}$ ) without HSA. Conditions: pH 7.4, 37  $^\circ\text{C}$ , 100 min, 5 nm \* 5 nm, 650 V,  $\lambda_{\text{ex}}$  = 445 nm.

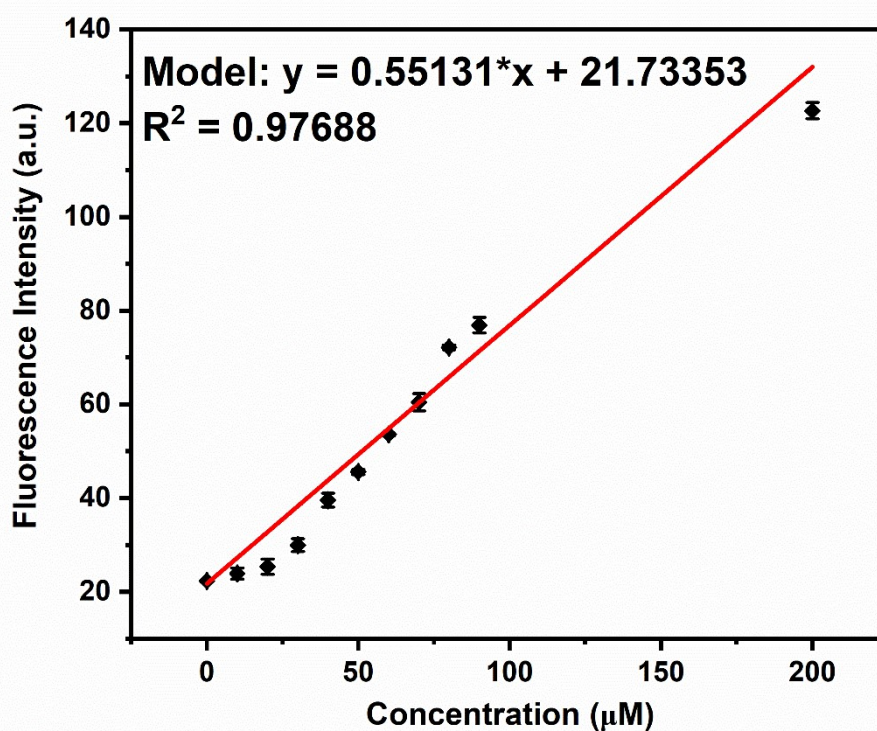

**Figure S8.** The fluorescence spectra of the detecting system containing TPABF-HS (10  $\mu\text{M}$ ) and HSA (0.6 mg/mL) with various concentrations (0-200  $\mu\text{M}$ ) of  $\text{H}_2\text{S}$ . Conditions: pH 7.4, 37  $^\circ\text{C}$ , 100 min, 5 nm \* 5 nm, 650 V,  $\lambda_{\text{ex}}$  = 445 nm.

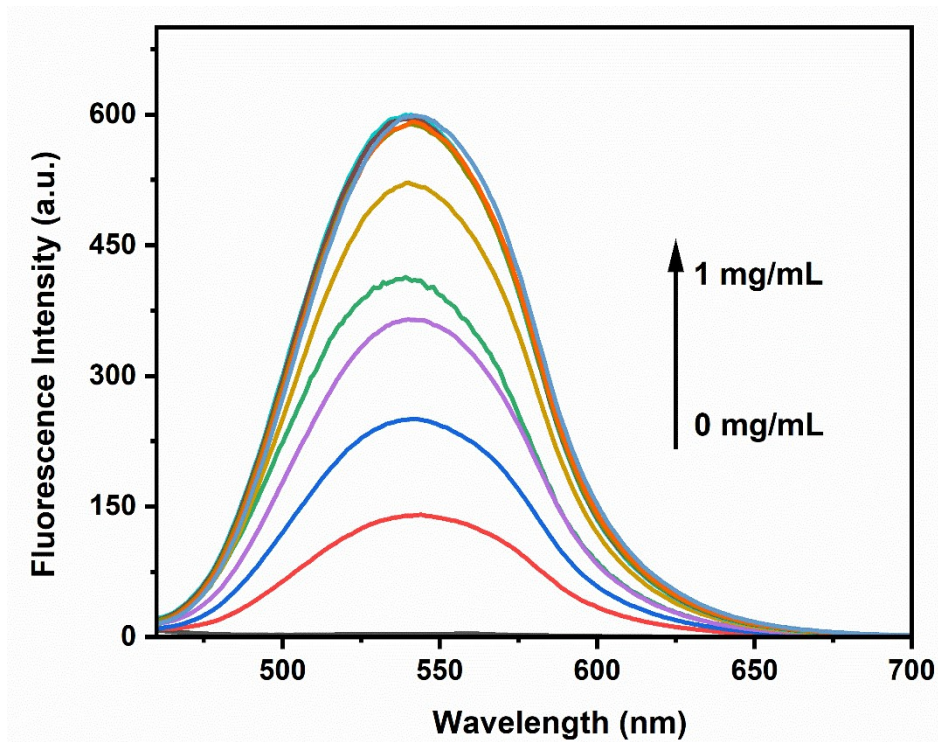

Figure S9. The fluorescence spectra of the detecting system containing TPABF-HS (10  $\mu$ M) and H<sub>2</sub>S (1 mM) with various concentrations (0-1 mg/mL) of HSA. Conditions: pH 7.4, 37  $^{\circ}$ C, 100 min, 5 nm \* 5 nm, 650 V,  $\lambda_{ex}$  = 445 nm.

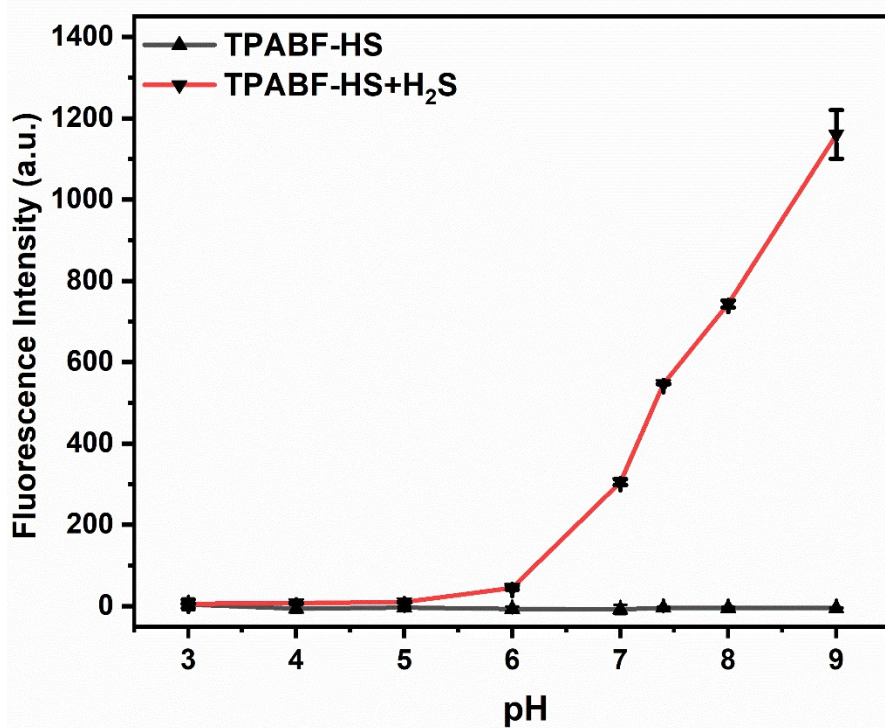

Figure S10. The fluorescence intensity of TPABF-HS (10  $\mu$ M) and TPABF-HS (10  $\mu$ M) with H<sub>2</sub>S (1 mM) were detected in buffer liquid systems with different pH (3.0-9.0). Conditions: 37  $^{\circ}$ C, 100 min, 5 nm \* 5 nm, 650 V,  $\lambda_{ex}$  = 445 nm.

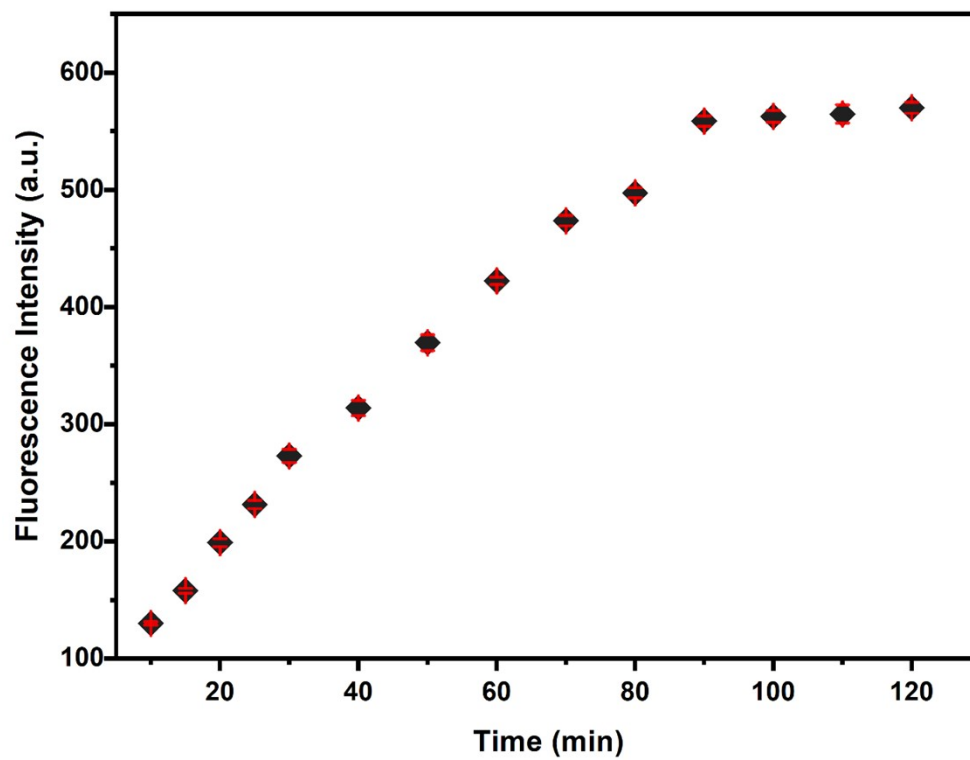

**Figure S11.** The fluorescence intensity of TPABF-HS (10  $\mu$ M) with H<sub>2</sub>S (1 mM) were detected under different reaction time (10-120 min). Conditions: pH 7.4, 37  $^{\circ}$ C, 5 nm \* 5 nm, 650 V,  $\lambda_{\text{ex}}$  = 445 nm.





Val, Ile, His, Gly, Trp; (d) proteins:  $\beta$ -glucanase, lysozyme, pepsase, trypsin, lipase; (e) thiols and sulfides: Cys, GSH, Hcy,  $\text{SO}_3^{2-}$ ,  $\text{SO}_4^{2-}$ ,  $\text{S}_2\text{O}_3^{2-}$ ,  $\text{S}_2\text{O}_4^{2-}$ ,  $\text{S}_2\text{O}_5^{2-}$ ; Conditions: pH 7.4, 37 °C, 100 min, 5 nm \* 5 nm, 650 V,  $\lambda_{\text{ex}} = 445$  nm.

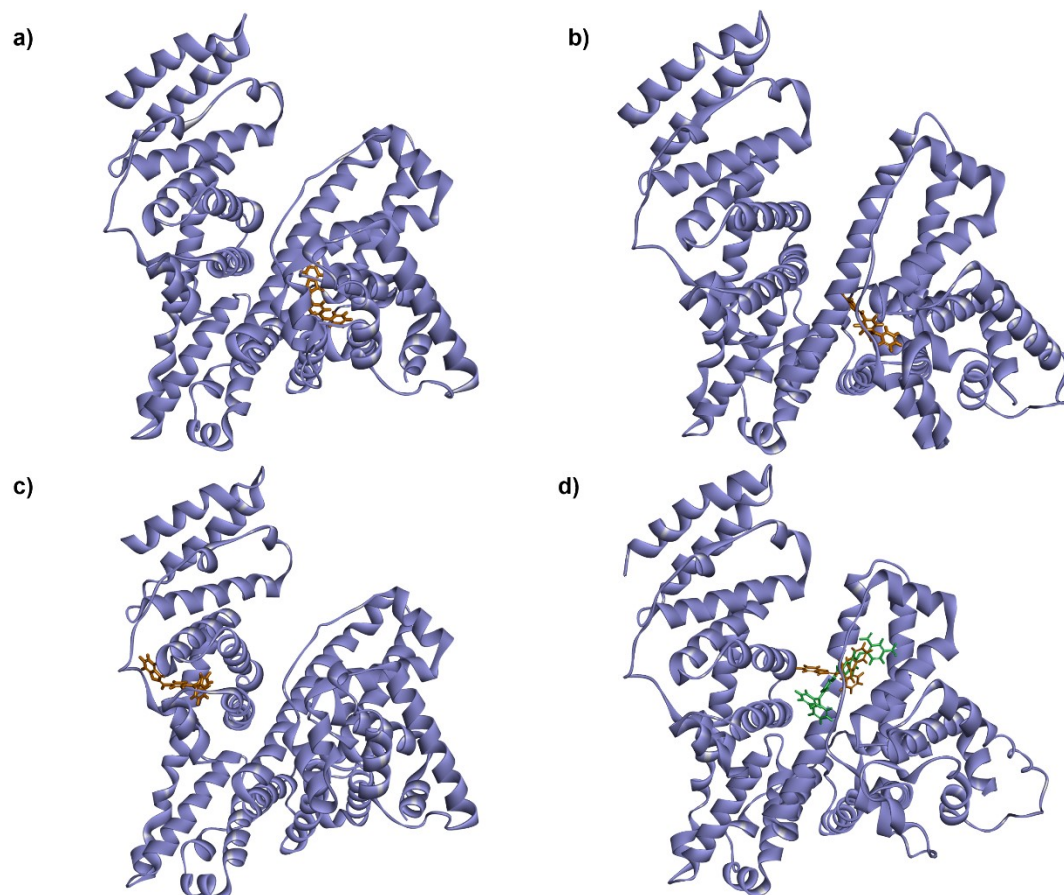

**Figure S14.** Molecular docking diagram of TPABF and TPABF-HS and HSA proteins. (a)The binding patterns of TPABF into the phenylbutazone - binding site; (b)The binding patterns of TPABF into the salicylic acid-binding site; (c)The binding patterns of TPABF into the ibuprofen-binding site; (d)The binding patterns of TPABF and TPABF-HS into the naproxen-binding site.

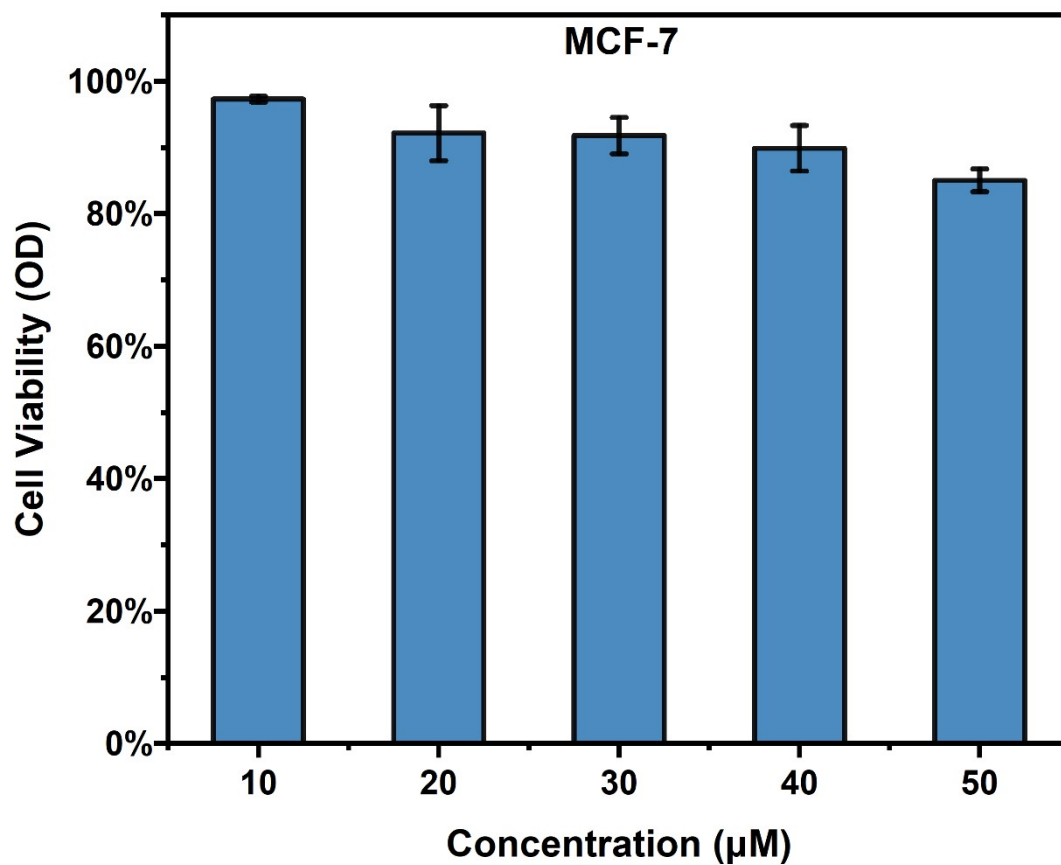

Figure S15. Cell viability of MCF-7 cells treated with different concentrations (10-50 μM) of TPABF-HS for 36 h at 37 °C.

Table S1. The comparison between the probe in this work and those previously reported.

| Probe                                                                               | $\lambda_{ex}/\lambda_{em}$<br>(nm) | Linear<br>interval<br>(μM) | LOD<br>(μM) | Application | Refer-<br>-nce |
|-------------------------------------------------------------------------------------|-------------------------------------|----------------------------|-------------|-------------|----------------|
| 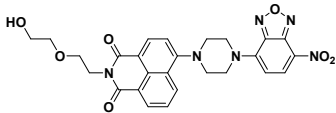 | 420/430                             | 10                         | 0.41        | HeLa cells  | [25]           |
|  | 465/527                             | 17                         | 1.18        | HeLa cells  | [26]           |

|                                                                                     |                    |      |       |                                               |      |
|-------------------------------------------------------------------------------------|--------------------|------|-------|-----------------------------------------------|------|
| 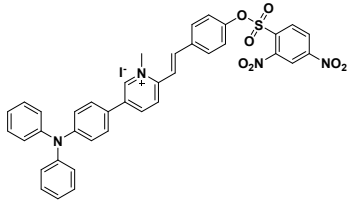   | 530/623            | 130  | 0.04  | Foodstuff, Water samples, HeLa cells          | [27] |
|    | 686/736            | 100  | /     | HeLa cells                                    | [28] |
|    | 390/542<br>390/630 | 1000 | 212.3 | HepG2 cells                                   | [29] |
|    | 600/658            | 70   | 0.004 | Food samples, HeLa cells                      | [30] |
|  | 430/545            | 10   | 1.15  | A549 cells                                    | [31] |
|  | -/487              | 100  | 0.372 | Water samples, Test strips, Fluorescent films | [32] |
|  | 580/760            | 9    | 0.04  | HeLa cells                                    | [33] |

|                                                                                     |         |      |       |                                   |                      |
|-------------------------------------------------------------------------------------|---------|------|-------|-----------------------------------|----------------------|
| 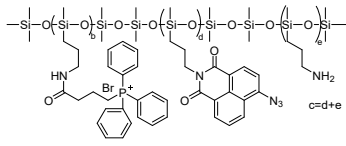   | 488/550 | 70   | 0.1   | HeLa cells,<br>Zebrafish          | [34]                 |
|    | 440/500 | 500  | 0.019 | Water samples,<br>MCF-7 cells     | [35]                 |
|    | 400/530 | 20   | 0.152 | CaKi-1 cells                      | [36]                 |
|   | 685/718 | 20   | 0.75  | Raw meal, Wheat<br>seeds          | [37]                 |
|  | 475/610 | 80   | 0.01  | HeLa cells                        | [38]                 |
|  | 420/500 | 40   | /     | HeLa cells                        | [39]                 |
|  | 445/540 | 1000 | 0.42  | MCF-7 cells,<br><i>C. elegans</i> | <b>This<br/>work</b> |
